# Supplementary material
Source: publisher figshare collection journal article supplement (https://karger.figshare.com/ndownloader/files/31070980)
Supplement: Supplementary file 1 [file 31070980]

**Supplementary Material**

**Physical and Chemical Compatibility of Etomidate and Propofol Injectable Emulsions**

Chunling Wanga, Shengnan Wangb, Cuishuan Wub, Li Leib, Dong-Xin Wangc*, Qiang Zhanga*

a Beijing Key Laboratory of Molecular Pharmaceutics and New Drug Delivery System, School of Pharmaceutical Sciences, Peking University, Beijing, 100191, China.

b Department of Pharmaceutics, Beijing Delivery Pharmaceutical Technology Co., Ltd, Beijing 102101, China.

c Department of Anesthesiology and Critical Care Medicine, Peking University First Hospital, Beijing 100034, China.

Short Title: The compatibility of Etomidate and Propofol

***Corresponding Authors**

**Qiang Zhang**

Beijing Key Laboratory of Molecular Pharmaceutics and New Drug Delivery System, School of Pharmaceutical Sciences

Peking University

Beijing ,100191, China

Tel/Fax: 86-10-82802791

E-mail: zqdodo@bjmu.edu.cn

**Dong-Xin Wang**

Department of Anesthesiology and Critical Care Medicine

Peking University First Hospital

Beijing, 100034, China.

Tel/Fax: 86-10-83572784

E-mail: wangdongxin@hotmail.com

The assay acceptance targets and validation results for HPLC method are shown in Table S[1](https://journal.pda.org/content/74/1/2.long#T1).

Table S1 Validation results for HPLC method

| Analytical Procedure Characteristics | Validation Target | Validation Result |
| --- | --- | --- |
| Linearity in the range:  Etomidate: 10-40 ng/mL  Propofol: 45-198 ng/mL | The coefficient of determination (R2) must be ≥0.98 | R2: 0.9995  R2: 0.9995 |
| Repeatability | The overall RSD of recovery must be ≦ 2.0% (N=6) | Etomidate: 1.76%  Propofol: 1.62% |
| Intermediate Precision | The overall RSD must be ≦ 2.0% (N=6) | Etomidate: 1.25%  Propofol: 1.24% |
| Robustness | The overall RSD must be ≦ 2.0% (N=6) | Etomidate: 0.46%  Propofol: 0.74% |
